# Supplementary material for: Sodium Hexametaphosphate Serves as an Inducer of Calcium Signaling
Source: MDPI journal article supplement (doi:10.3390/biom13040577), 2023-03-23
Supplement: s1 [file s1]

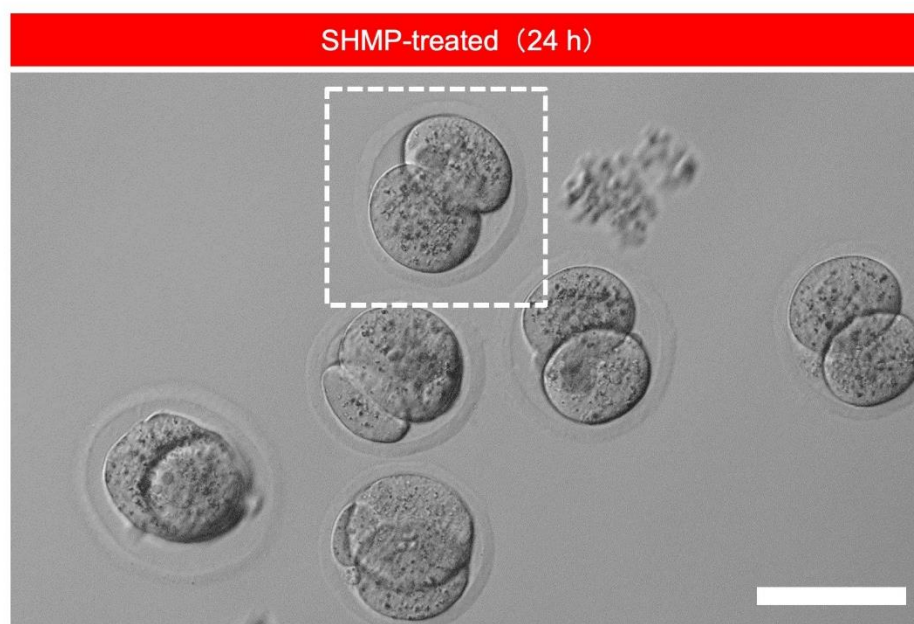

**Supplemental Figure S2. Bright-field images of oocytes after SHMP treatment.** The dotted box is enlarged in Figure 3b. Scale bar, 50  $\mu\text{m}$ .
