# Supplementary material for: Sodium Hexametaphosphate Serves as an Inducer of Calcium Signaling
Source: MDPI journal article supplement (doi:10.3390/biom13040577), 2023-03-23
Supplement: s1 [file s1]

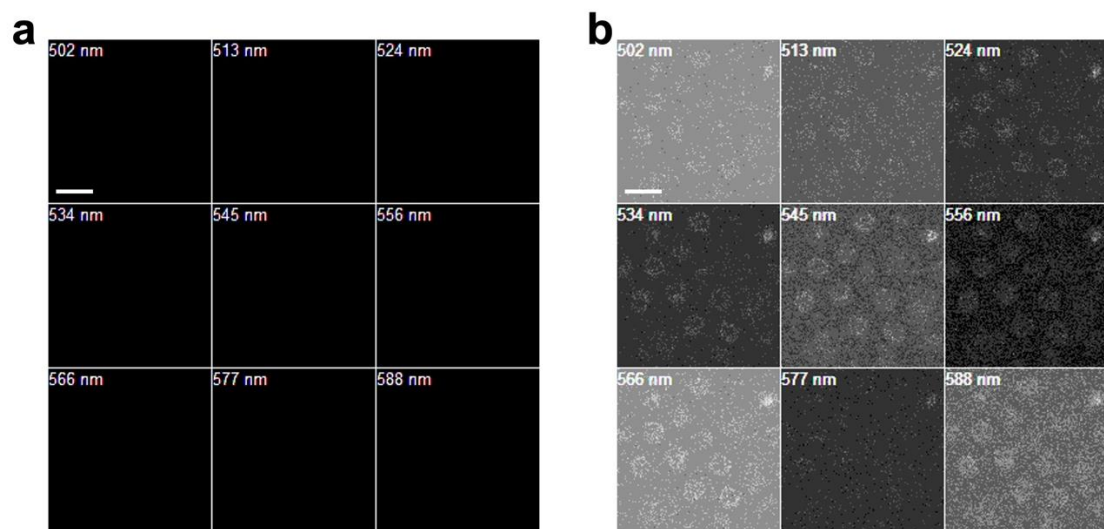

**Supplemental Figure S1. Detection of phosphate polymers by DAPI staining and electrophoresis. a,** Unstained oocytes served as negative controls. **b,** Images with enhanced contrast and brightness. Scale bars, 100  $\mu\text{m}$ .
