# Supplementary material for: Sodium Hexametaphosphate Serves as an Inducer of Calcium Signaling
Source: Biomolecules. 2023 Mar 23;13(4):577. doi: 10.3390/biom13040577 (PMC10135451; doi:10.3390/biom13040577)
Supplement: Supplementary file 1 [file biomolecules-13-00577-s001.zip]

Archive with 4 entries (4 files):
- Supplemental Figure S1.pdf
- Supplemental Figure S2.pdf
- Supplemental Movie 1_Monitoring SHMP-treated oocytes 4 h after incubation.ts
- Supplemental Movie 2_Monitoring untreated oocytes 4 h after incubation.ts
